# Supplementary material for: Changes in US Hospital Financial Performance During the COVID-19 Public Health Emergency
Source: PubMed Central journal article supplement (PMC10349333; doi:10.1001/jamahealthforum.2023.1928), 2023-07-14
Supplement: jamahealthforum-e231928-s001.pdf [file jamahealthforum-e231928-s001.pdf]

## Supplemental Online Content

Gidwani R, Damberg CL. Changes in US hospital financial performance during the COVID-19 public health emergency. *JAMA Health Forum*. 2023;4(7):e231928. doi:10.1001/jamahealthforum.2023.1928

### **eTable 1.** Correlation coefficients for covariates used in regression models

This supplemental material has been provided by the authors to give readers additional information about their work.

Appendix Table A1. Correlation Coefficients for Covariates Used in Regression Models

|                                                          | Hospital Type | Urbanicity | Teaching Hospital | Belongs to a Healthcare System | DSH Status | Uncompensated Care as a Proportion of Operating Expenses | PHE Funding as a Proportion of Operating Expenses | 20% or more Black Population | 20% or more of Population Below Poverty Line | 20% or more Hispanic Population | Ownership Status |
|----------------------------------------------------------|---------------|------------|-------------------|--------------------------------|------------|----------------------------------------------------------|---------------------------------------------------|------------------------------|----------------------------------------------|---------------------------------|------------------|
| Hospital type                                            | 1             |            |                   |                                |            |                                                          |                                                   |                              |                                              |                                 |                  |
| Urbanicity                                               | -0.49         | 1          |                   |                                |            |                                                          |                                                   |                              |                                              |                                 |                  |
| Teaching hospital                                        | -0.38         | 0.39       | 1                 |                                |            |                                                          |                                                   |                              |                                              |                                 |                  |
| Belongs to a healthcare system                           | -0.34         | 0.29       | 0.30              | 1                              |            |                                                          |                                                   |                              |                                              |                                 |                  |
| DSH status                                               | -0.500        | 0.18       | 0.32              | 0.29                           | 1          |                                                          |                                                   |                              |                                              |                                 |                  |
| Uncompensated care as a proportion of operating expenses | -0.07         | -0.04      | -0.07             | 0.06                           | 0.16       | 1                                                        |                                                   |                              |                                              |                                 |                  |
| PHE funding as a proportion of operating expenses        | 0.21          | -0.22      | -0.15             | -0.24                          | -0.07      | -0.01                                                    | 1                                                 |                              |                                              |                                 |                  |
| 20% or more Black population                             | -0.15         | 0.10       | 0.11              | -0.01                          | 0.11       | 0.08                                                     | 0.02                                              | 1                            |                                              |                                 |                  |
| 20% or more of population below poverty line             | -0.02         | -0.13      | -0.02             | -0.14                          | 0.09       | 0.13                                                     | 0.09                                              | 0.44                         | 1                                            |                                 |                  |
| 20% or more Hispanic population                          | 0.14          | 0.24       | 0.09              | -0.05                          | 0.07       | 0.15                                                     | -0.06                                             | -0.04                        | 0.08                                         | 1                               |                  |
| Ownership Status                                         | 0.18          | -0.15      | -0.14             | -0.36                          | -0.11      | 0.10                                                     | 0.10                                              | 0.11                         | 0.14                                         | 0.11                            | 1                |
