# Supplementary material for: Changes in US Hospital Financial Performance During the COVID-19 Public Health Emergency
Source: PubMed Central journal article supplement (PMC10349333; doi:10.1001/jamahealthforum.2023.1928), 2023-07-14
Supplement: jamahealthforum-e231928-s002.pdf [file jamahealthforum-e231928-s002.pdf]

## Data Sharing Statement

Gidwani. Changes in US Hospital Financial Performance During the COVID-19 Public Health Emergency. *JAMA Health Forum*. Published July 14, 2023.

doi:10.1001/jamahealthforum.2023.1928

### Data

**Data available:** Yes

**Data types:** Other (please specify)

**Additional Information:** All data are available from the RAND Hospital data team, pursuant to completion of appropriate data use agreements.

**How to access data:** <https://www.hospitaldatasets.org/>

**When available:** With publication

### Supporting Documents

**Document types:** None

### Additional Information

**Who can access the data:** Researchers who proposed use of the data has been approved.

**Types of analyses:** For any purpose.

**Mechanisms of data availability:** With a signed data use agreement.
